# Supplementary material for: Abundance and functional diversity of riboswitches in microbial communities
Source: PubMed Central journal article supplement (PMC2211319; doi:10.1186/1471-2164-8-347), 2007-10-01
Supplement: 1471-2164-8-347-S1.pdf [file 1471-2164-8-347-S1.pdf]

| Protein function                                                                                                                                                               | Gene         | Number of riboswitches in metagenomes<br>(grouped by taxonomy) |                  |                              |
|--------------------------------------------------------------------------------------------------------------------------------------------------------------------------------|--------------|----------------------------------------------------------------|------------------|------------------------------|
|                                                                                                                                                                                |              | Sargasso Sea                                                   | Minnesota Soil   | Whale Falls                  |
| Methionine synthase I<br>(cobalamin-dependent), methyltransferase<br>domain (COG0646)                                                                                          | <i>metH</i>  | Bacteroidetes/<br>Chlorobi 2                                   | -                | Bacteroidetes/<br>Chlorobi 1 |
| Homoserine trans-succinylase (COG1897)                                                                                                                                         | <i>metA</i>  | Cyanobacteria 1                                                | -                | -                            |
| Homoserine dehydrogenase (COG0460)                                                                                                                                             | <i>hom</i>   | -                                                              | Bacteria 2       | -                            |
| Homoserine acetyltransferase (COG2021)                                                                                                                                         | <i>met2</i>  | -                                                              | -                | Bacteroidetes/<br>Chlorobi 1 |
| Threonine synthase (COG0498)                                                                                                                                                   | <i>thrC</i>  | -                                                              | Actinobacteria 1 | -                            |
| O-acetylhomoserine sulphydrylase (COG2873)                                                                                                                                     | <i>met17</i> | -                                                              | Bacteria 1       | -                            |
| <b>5-methylthioribose-1-phosphate iso-<br/>merase homologous to predicted<br/>translation initiation factor 2B sub-<br/>unit, eIF-2B alpha/beta/delta family<br/>(COG0182)</b> | <i>gcn3</i>  | -                                                              | Bacteria 1       | -                            |
| Unknown function (no similar proteins)                                                                                                                                         |              | -                                                              | -                | 1                            |

Additional file 1: S-boxes (SAM-riboswitches) and their regulated functions identified in three metagenomes. New functions are set in boldface.
