# Supplementary material for: Abundance and functional diversity of riboswitches in microbial communities
Source: PubMed Central journal article supplement (PMC2211319; doi:10.1186/1471-2164-8-347), 2007-10-01
Supplement: 1471-2164-8-347-S2.pdf [file 1471-2164-8-347-S2.pdf]

| Protein function                                        | Gene        | Number of riboswitches in metagenomes<br>(grouped by taxonomy) |                                           |                                         |
|---------------------------------------------------------|-------------|----------------------------------------------------------------|-------------------------------------------|-----------------------------------------|
|                                                         |             | Sargasso Sea                                                   | Minnesota Sea<br>$\gamma$ -Proteobacteria | Whale Falls<br>$\delta$ -Proteobacteria |
| 3,4-dihydroxy-2-butanone 4-phosphate synthase (COG0108) | <i>ribB</i> | -                                                              | 1                                         | 1                                       |
| Pyrimidine reductase, riboflavin biosynthesis (COG1985) | <i>ribD</i> | Bacteria                                                       | 1                                         | -                                       |
| Riboflavin synthase alpha chain (COG0307)               | <i>ribC</i> | Bacteria                                                       | 1                                         | -                                       |
| Riboflavin synthase beta-chain (COG0054)                | <i>ribH</i> | -                                                              | Bacteria                                  | 1                                       |
|                                                         |             |                                                                |                                           | $\alpha$ -Proteobacteria                |
|                                                         |             |                                                                |                                           | 2                                       |

Additional file 2: RFN-elements (FMN-riboswitches) and their regulated functions identified in three metagenomes.
