# Supplementary material for: Abundance and functional diversity of riboswitches in microbial communities
Source: PubMed Central journal article supplement (PMC2211319; doi:10.1186/1471-2164-8-347), 2007-10-01
Supplement: 1471-2164-8-347-S3.pdf [file 1471-2164-8-347-S3.pdf]

| Protein function                                                                          | Gene               | Number of riboswitches in metagenomes<br>(grouped by taxonomy) |                                 |                                 |
|-------------------------------------------------------------------------------------------|--------------------|----------------------------------------------------------------|---------------------------------|---------------------------------|
|                                                                                           |                    | Sargasso Sea                                                   | Minnesota Soil                  | Whale Falls                     |
| Outer membrane cobalamin receptor protein<br>(COG4206)                                    | <i>btuB</i>        | 4<br>α-Proteobacteria                                          | 1<br>Bacteroidetes/<br>Chlorobi | 3<br>Bacteroidetes/<br>Chlorobi |
|                                                                                           |                    | 3<br>β-Proteobacteria                                          | 1<br>α-Proteobacteria           | 1<br>α-Proteobacteria           |
|                                                                                           |                    | 9<br>γ-Proteobacteria                                          | 1<br>γ-Proteobacteria           | 1<br>γ-Proteobacteria           |
| Putative GTPases (G3E family) (COG0523)                                                   | <i>cobW</i>        | 2<br>α-Proteobacteria                                          | -                               | -                               |
| Hydrogenase/urease accessory protein (COG2370)                                            | <i>hupE</i>        | 2<br>α-Proteobacteria                                          | -                               | -                               |
| ABC-type Fe3+-siderophore transport system, per-<br>mease component (COG0609)             | <i>btuC</i>        | -                                                              | -                               | 1<br>Bacteria                   |
| ABC-type Fe3+-hydroxamate transport system,<br>periplasmic component (COG0614)            | <i>fecB</i>        | -                                                              | 2<br>Bacteria                   | 1<br>α-Proteobacteria           |
| Adenosyl cobinamide kinase/adenosyl cobinamide<br>phosphate guanylyltransferase (COG2087) | <i>cobU</i>        | -                                                              | -                               | 1<br>α-Proteobacteria           |
| Methionine synthase II (cobalamin-independent)<br>(COG0620)                               | <i>metE</i>        | -                                                              | -                               | 1<br>Bacteroidetes/<br>Chlorobi |
| <b>Fatty-acid desaturase (COG1398)</b>                                                    | <b><i>ole1</i></b> | -                                                              | 1<br>γ-Proteobacteria           | -                               |
| Unknown function                                                                          |                    | 3<br>No ORF                                                    | 3                               | -                               |
|                                                                                           |                    | 6<br>No similar proteins                                       | 5                               | 4                               |
|                                                                                           |                    | 3<br>End of DNA fragment                                       | -                               | -                               |

Additional file 3: B<sub>12</sub>-elements and their regulated functions identified in three metagenomes. New functions are set in boldface.
