# Supplementary material for: Abundance and functional diversity of riboswitches in microbial communities
Source: PubMed Central journal article supplement (PMC2211319; doi:10.1186/1471-2164-8-347), 2007-10-01
Supplement: 1471-2164-8-347-S4.pdf [file 1471-2164-8-347-S4.pdf]

| Protein function                                                                                    | Gene         | Number of riboswitches in metagenomes<br>(grouped by taxonomy) |                                 |                                 |  |
|-----------------------------------------------------------------------------------------------------|--------------|----------------------------------------------------------------|---------------------------------|---------------------------------|--|
|                                                                                                     |              | Sargasso Sea                                                   | Minnesota Soil                  | Whale Falls                     |  |
| ABC-type thiamine transport system, periplasmic component (COG4143)                                 | <i>thiB</i>  | 4<br>α-Proteobacteria                                          | 1<br>γ-Proteobacteria           | 2<br>α-Proteobacteria           |  |
| Thiamine biosynthesis protein ThiC (COG0422)                                                        | <i>thiC</i>  | 13<br>γ-Proteobacteria<br>Bacteria                             | 1<br>Bacteria                   | 2<br>γ-Proteobacteria           |  |
|                                                                                                     |              | 3<br>γ-Proteobacteria                                          | 4<br>Bacteria                   | 4<br>γ-Proteobacteria           |  |
|                                                                                                     |              | 2<br>β-Proteobacteria                                          | 2<br>α-Proteobacteria           | 2<br>α-Proteobacteria           |  |
| Outer membrane receptor proteins, mostly Fe transport (COG1629)                                     | <i>btuB</i>  | 1<br>Cyanobacteria                                             | 1<br>Bacteria                   | 1<br>Bacteria                   |  |
|                                                                                                     |              | 9<br>γ-Proteobacteria                                          | 1<br>Bacteroidetes/<br>Chlorobi | 1<br>Bacteroidetes/<br>Chlorobi |  |
| ABC-type nitrate/sulfonate/bicarbonate transport system, periplasmic component (COG0715)            | <i>tauA</i>  | 2<br>α-Proteobacteria                                          | -                               | -                               |  |
| ABC-type nitrate/sulfonate/bicarbonate transport system, ATPase component (COG1116)                 | <i>tauB</i>  | 2<br>Firmicutes                                                | -                               | -                               |  |
| ABC-type nitrate/sulfonate/bicarbonate transport system, permealase component (COG0600)             | <i>tauC</i>  | 1<br>Firmicutes                                                | -                               | -                               |  |
| Hydroxyethylthiazole kinase, sugar kinase family (COG2145)                                          | <i>thiM</i>  | 2<br>α-Proteobacteria                                          | 1<br>α-Proteobacteria           | -                               |  |
| Na <sup>+</sup> /proline, Na <sup>+</sup> /panthothenate symporters and related permeases (COG0591) | <i>panF</i>  | 1<br>Bacteria                                                  | -                               | -                               |  |
|                                                                                                     |              | 1<br>α-Proteobacteria                                          | -                               | -                               |  |
| Thiamine pyrophosphokinase (COG1564)                                                                | <i>thiS0</i> | -                                                              | 2<br>Bacteria                   | -                               |  |
| Hydroxymethylpyrimidine/phosphomethylpyrimidine kinase (COG0351)                                    | <i>thiD</i>  | -                                                              | -                               | 1<br>α-Proteobacteria           |  |
| Unknown function                                                                                    |              | 1<br>No ORF                                                    | -                               | -                               |  |
|                                                                                                     |              | 8<br>No similar proteins                                       | 2                               | 2                               |  |
|                                                                                                     |              | 8<br>End of DNA fragment                                       | -                               | 2                               |  |

Additional file 4: Thiamine riboswitches and their regulated functions identified in three metagenomes.
