# Supplementary material for: Abundance and functional diversity of riboswitches in microbial communities
Source: PubMed Central journal article supplement (PMC2211319; doi:10.1186/1471-2164-8-347), 2007-10-01
Supplement: 1471-2164-8-347-S5.pdf [file 1471-2164-8-347-S5.pdf]

| Protein function                                                                   | Gene               | Number of riboswitches in metagenomes<br>(grouped by taxonomy) |                            |                            |
|------------------------------------------------------------------------------------|--------------------|----------------------------------------------------------------|----------------------------|----------------------------|
|                                                                                    |                    | Sargasso Sea                                                   | Minnesota Soil             | Whale Falls                |
| Glycine cleavage system T protein (aminomethyltransferase) (COG0404)               | <i>gcvT</i>        | $\alpha$ -Proteobacteria 59                                    | $\alpha$ -Proteobacteria 2 | $\alpha$ -Proteobacteria 3 |
| <b>Malate synthase (COG2225)</b>                                                   | <b><i>glcB</i></b> | $\beta$ -Proteobacteria 1                                      |                            | $\gamma$ -Proteobacteria 3 |
|                                                                                    |                    | $\gamma$ -Proteobacteria 1                                     |                            | $\beta$ -Proteobacteria 1  |
| Glycine/D-amino acid oxidase (deaminating) (COG0665)                               | <i>dadA</i>        | $\alpha$ -Proteobacteria 22                                    |                            | -                          |
|                                                                                    |                    | $\gamma$ -Proteobacteria 2                                     |                            | -                          |
| Na <sup>+</sup> /alanine symporter (COG1115)                                       | <i>alsT</i>        | $\alpha$ -Proteobacteria 2                                     |                            | $\beta$ -Proteobacteria 1  |
| Glycine cleavage system protein P (pyridoxal-binding), C-terminal domain (COG1003) | <i>gcvP</i>        | $\gamma$ -Proteobacteria 1                                     |                            | -                          |
| L-serine deaminase (COG1760)                                                       | <i>sdaA</i>        | $\beta$ -Proteobacteria 1                                      | $\gamma$ -Proteobacteria 1 | -                          |
| <b>Phosphoserine aminotransferase (COG1932)</b>                                    | <b><i>serC</i></b> | -                                                              |                            | Bacteria 1                 |
| <b>Uncharacterized conserved protein (COG4198)</b>                                 | -                  | Bacteria 1                                                     |                            | -                          |
| Unknown function                                                                   |                    | Firmicutes 5                                                   |                            | -                          |
|                                                                                    |                    | -                                                              |                            | -                          |
|                                                                                    |                    | -                                                              |                            | 1                          |

Additional file 5: Glycine riboswitches and their regulated functions identified in three metagenomes. New functions are set in boldface.
