# Supplementary material for: Abundance and functional diversity of riboswitches in microbial communities
Source: PubMed Central journal article supplement (PMC2211319; doi:10.1186/1471-2164-8-347), 2007-10-01
Supplement: 1471-2164-8-347-S6.pdf [file 1471-2164-8-347-S6.pdf]

| Protein function                                                                                 | Gene        | Number of riboswitches in metagenomes<br>(grouped by taxonomy) |                              |                                                                |
|--------------------------------------------------------------------------------------------------|-------------|----------------------------------------------------------------|------------------------------|----------------------------------------------------------------|
|                                                                                                  |             | Sargasso Sea                                                   | Minnesota Soil               | Whale Falls                                                    |
| ABC-type nitrate/sulfonate/taurine/bicarbonate transport system, periplasmic component (COG0715) | <i>tauA</i> | -                                                              | -                            | $\delta$ -Proteobacteria<br>$\alpha$ -Proteobacteria<br>2<br>1 |
| ABC-type nitrate/sulfonate/bicarbonate transport system, perimease component (COG0600)           | <i>tauC</i> | -                                                              | -                            | $\gamma$ -Proteobacteria<br>1                                  |
| Amino acid transporters (COG0531)                                                                | <i>potE</i> | -                                                              | $\beta$ -Proteobacteria<br>1 | -                                                              |

Additional file 6: YKKC/YXKD riboswitches and their regulated functions identified in three metagenomes.
