# Supplementary material for: Abundance and functional diversity of riboswitches in microbial communities
Source: PubMed Central journal article supplement (PMC2211319; doi:10.1186/1471-2164-8-347), 2007-10-01
Supplement: 1471-2164-8-347-S7.pdf [file 1471-2164-8-347-S7.pdf]

| Protein function                                                                | Gene                | Number of riboswitches in metagenomes<br>(grouped by taxonomy) |                          |             |                          |   |
|---------------------------------------------------------------------------------|---------------------|----------------------------------------------------------------|--------------------------|-------------|--------------------------|---|
|                                                                                 |                     | Sargasso Sea                                                   | Minnesota Soil           | Whale Falls |                          |   |
| Predicted membrane protein (COG2119)                                            | -                   | -                                                              | $\beta$ -Proteobacteria  | 1           | $\alpha$ -Proteobacteria | 1 |
| Predicted membrane protein (COG1971)                                            | -                   | 2                                                              | $\gamma$ -Proteobacteria | -           |                          | - |
| Membrane protein TerC, possibly involved in tel-<br>lurium resistance (COG0861) | <i>terC</i>         | -                                                              | Bacteria                 | 4           |                          | - |
| Unknown function                                                                | No ORF              | -                                                              |                          | 1           |                          | 2 |
|                                                                                 | No similar proteins | -                                                              |                          | -           |                          | - |
|                                                                                 | End of DNA fragment | -                                                              |                          | -           |                          | - |

Additional file 7: YYBP/YKQY riboswitches and their regulated functions identified in three metagenomes.
