# Supplementary material for: Abundance and functional diversity of riboswitches in microbial communities
Source: PubMed Central journal article supplement (PMC2211319; doi:10.1186/1471-2164-8-347), 2007-10-01
Supplement: 1471-2164-8-347-S13.pdf [file 1471-2164-8-347-S13.pdf]

Additional file 13: (A) Glycine riboswitch pattern. (B) List of identified glycine riboswitches. (C) Alignment of glycine riboswitch sequences.

**A**

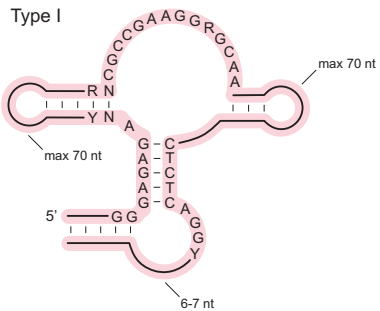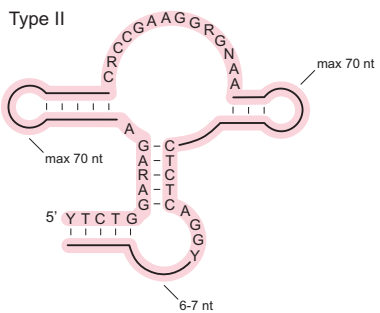

**B**

| Accession    | Metagenome | Start position | End position | Regulated function (COG) |
|--------------|------------|----------------|--------------|--------------------------|
| CH004480     | Sargasso   | 22329          | 22095        | COG1115                  |
| CH004560     | Sargasso   | 12265          | 12112        | COG0404                  |
| CH004588     | Sargasso   | 199731         | 199467       | COG0404                  |
| CH004791     | Sargasso   | 913            | 759          | COG0404                  |
| CH004804     | Sargasso   | 2864           | 3020         | COG2225                  |
| CH006134     | Sargasso   | 743            | 889          | COG0404                  |
| CH007312     | Sargasso   | 3603           | 3453         | COG0404                  |
| CH008153     | Sargasso   | 2710           | 2556         | COG4198                  |
| CH010153     | Sargasso   | 5220           | 5069         | COG0404                  |
| CH011183     | Sargasso   | 1755           | 1601         | COG4198                  |
| CH011659     | Sargasso   | 1637           | 1811         | COG1003                  |
| CH011954     | Sargasso   | 667            | 749          | COG193                   |
| CH011983     | Sargasso   | 2959           | 2805         | COG4198                  |
| CH012769     | Sargasso   | 2350           | 2201         | COG0404                  |
| CH012961     | Sargasso   | 961            | 1112         | COG2225                  |
| CH013016     | Sargasso   | 13773          | 13618        | COG0404                  |
| CH013294     | Sargasso   | 1816           | 1969         | COG0404                  |
| CH015205     | Sargasso   | 1386           | 1539         | COG2225                  |
| CH016265     | Sargasso   | 3331           | 3481         | COG2225                  |
| CH017510     | Sargasso   | 2573           | 2418         | COG4198                  |
| CH017782     | Sargasso   | 2651           | 2806         | COG0404                  |
| CH017863     | Sargasso   | 1451           | 1598         | COG0404                  |
| CH018172     | Sargasso   | 3511           | 3361         | COG0404                  |
| CH018728     | Sargasso   | 2076           | 1922         | COG2225                  |
| CH020130     | Sargasso   | 104            | 258          | COG0404                  |
| CH020513     | Sargasso   | 3268           | 3418         | COG2225                  |
| CH020674     | Sargasso   | 2952           | 2797         | COG0404                  |
| CH020926     | Sargasso   | 4460           | 4306         | COG0404                  |
| CH021291     | Sargasso   | 354            | 202          | COG2225                  |
| CH021582     | Sargasso   | 4258           | 4364         | COG0404                  |
| CH021884     | Sargasso   | 3064           | 3215         | COG0404                  |
| CH022553     | Sargasso   | 2666           | 2516         | COG0404                  |
| CH023146     | Sargasso   | 2511           | 2361         | COG0404                  |
| CH023194     | Sargasso   | 254            | 402          | COG0404                  |
| CH023307     | Sargasso   | 6379           | 6229         | COG2225                  |
| CH023495     | Sargasso   | 7543           | 7693         | COG2225                  |
| CH023621     | Sargasso   | 1239           | 1415         | COG0404                  |
| CH024864     | Sargasso   | 4718           | 4569         | COG0404                  |
| CH025192     | Sargasso   | 2898           | 2743         | COG0404                  |
| CH025209     | Sargasso   | 4630           | 4779         | COG0404                  |
| CH025408     | Sargasso   | 2036           | 1881         | COG0404                  |
| CH025417     | Sargasso   | 26854          | 26704        | COG0404                  |
| CH025460     | Sargasso   | 4746           | 4897         | COG0404                  |
| CH025596     | Sargasso   | 12283          | 12134        | COG0404                  |
| CH025790     | Sargasso   | 12265          | 12420        | COG2225                  |
| CH027219     | Sargasso   | 8205           | 8358         | COG0404                  |
| CH027494     | Sargasso   | 18921          | 19069        | COG0404                  |
| CH027603     | Sargasso   | 17163          | 17317        | COG0404                  |
| CH066412     | Sargasso   | 5792           | 5946         | No ORF                   |
| CH071812     | Sargasso   | 187            | 36           | No ORF                   |
| CH073298     | Sargasso   | 358            | 201          | COG0404                  |
| CH074447     | Sargasso   | 5470           | 5620         | COG2225                  |
| CH076671     | Sargasso   | 5548           | 5394         | COG0404                  |
| CH078525     | Sargasso   | 766            | 915          | No ORF                   |
| CH082615     | Sargasso   | 459            | 609          | COG2225                  |
| CH084621     | Sargasso   | 355            | 204          | COG2225                  |
| CH085125     | Sargasso   | 5557           | 5712         | COG0404                  |
| CH090711     | Sargasso   | 1266           | 1111         | COG2225                  |
| CH095246     | Sargasso   | 48             | 218          | COG0665                  |
| CH099209     | Sargasso   | 6146           | 6301         | COG0404                  |
| CH099604     | Sargasso   | 6282           | 6129         | End of DNA fragment      |
| CH107700     | Sargasso   | 685            | 855          | No ORF                   |
| CH108739     | Sargasso   | 158            | 1            | End of DNA fragment      |
| CH110771     | Sargasso   | 6436           | 6591         | COG2225                  |
| CH112937     | Sargasso   | 6223           | 6374         | COG0404                  |
| CH113666     | Sargasso   | 264            | 115          | COG0404                  |
| CH113875     | Sargasso   | 6782           | 6631         | COG2225                  |
| CH119896     | Sargasso   | 74             | 267          | COG0404                  |
| CH120223     | Sargasso   | 3370           | 3218         | COG2225                  |
| CH123522     | Sargasso   | 3491           | 3339         | COG0404                  |
| CH125274     | Sargasso   | 2650           | 2833         | COG0404                  |
| CH127439     | Sargasso   | 638            | 464          | COG0404                  |
| CH127838     | Sargasso   | 156            | 1            | End of DNA fragment      |
| CH128974     | Sargasso   | 2814           | 2662         | End of DNA fragment      |
| CH144138     | Sargasso   | 3958           | 4107         | COG0404                  |
| CH145003     | Sargasso   | 463            | 616          | COG0404                  |
| CH147036     | Sargasso   | 312            | 158          | COG0404                  |
| CH148831     | Sargasso   | 518            | 365          | COG0404                  |
| CH149128     | Sargasso   | 4250           | 4100         | COG2225                  |
| CH152090     | Sargasso   | 4328           | 4176         | COG0404                  |
| CH153469     | Sargasso   | 72             | 223          | COG2225                  |
| CH160558     | Sargasso   | 318            | 401          | COG4198                  |
| CH161879     | Sargasso   | 4420           | 4590         | COG0665                  |
| CH165648     | Sargasso   | 4282           | 4132         | COG0404                  |
| CH167803     | Sargasso   | 601            | 683          | End of DNA fragment      |
| CH169997     | Sargasso   | 609            | 458          | COG2225                  |
| CH172733     | Sargasso   | 2007           | 1852         | COG0404                  |
| CH178850     | Sargasso   | 716            | 568          | COG0404                  |
| CH179282     | Sargasso   | 699            | 551          | COG0404                  |
| CH182662     | Sargasso   | 626            | 472          | COG2225                  |
| CH187196     | Sargasso   | 165            | 1            | End of DNA fragment      |
| CH189992     | Sargasso   | 2154           | 2000         | COG0404                  |
| CH192214     | Sargasso   | 2006           | 1856         | COG2225                  |
| CH193729     | Sargasso   | 1596           | 1746         | COG2225                  |
| CH193852     | Sargasso   | 388            | 240          | COG0404                  |
| CH193915     | Sargasso   | 2063           | 1887         | COG0404                  |
| CH203668     | Sargasso   | 1821           | 1666         | COG0404                  |
| CH205377     | Sargasso   | 1978           | 1823         | COG2225                  |
| CH205699     | Sargasso   | 173            | 321          | COG0404                  |
| CH212688     | Sargasso   | 321            | 472          | COG0404                  |
| CH213866     | Sargasso   | 2294           | 2448         | COG0404                  |
| CH215823     | Sargasso   | 169            | 318          | COG0404                  |
| CH217657     | Sargasso   | 2690           | 2835         | End of DNA fragment      |
| CH217994     | Sargasso   | 2104           | 2259         | COG0404                  |
| CH230524     | Sargasso   | 375            | 523          | COG0404                  |
| CH234615     | Sargasso   | 347            | 198          | COG0404                  |
| AAFX01016906 | Soil       | 854            | 674          | COG0404                  |
| AAFX01042973 | Soil       | 245            | 50           | End of DNA fragment      |
| AAFX01074356 | Soil       | 708            | 464          | COG1003                  |
| AAFX01086649 | Soil       | 565            | 375          | COG0404                  |
| AAFZ01013399 | Whale2     | 650            | 438          | COG0665                  |
| AAFZ01013783 | Whale2     | 487            | 735          | COG0404                  |
| AAFZ01014837 | Whale2     | 525            | 718          | COG0404                  |
| AAFZ01019250 | Whale2     | 544            | 310          | COG1760                  |
| AAFZ01024364 | Whale2     | 419            | 229          | COG0404                  |
| AAFZ01025915 | Whale2     | 380            | 180          | COG0404                  |
| AAFZ01027930 | Whale2     | 601            | 401          | COG0404                  |
| AAGA01003599 | Whale3     | 265            | 456          | COG0404                  |
| AAGA01022452 | Whale3     | 684            | 470          | COG0404                  |

C

Structure

Genomic coordinates and sequence alignment for the C region. The top part shows a diagram of the structure with colored arrows indicating regions. Below is a list of coordinates from CH004480 to CH099209, with corresponding DNA sequences and alignment markers.

Structure

Genomic coordinates and sequence alignment for the C region, continuing from the previous block. It includes a diagram at the top and a list of coordinates from CH004480 to CH099209 with their respective DNA sequences and alignment markers.
