# Supplementary material for: Abundance and functional diversity of riboswitches in microbial communities
Source: PubMed Central journal article supplement (PMC2211319; doi:10.1186/1471-2164-8-347), 2007-10-01
Supplement: 1471-2164-8-347-S14.pdf [file 1471-2164-8-347-S14.pdf]

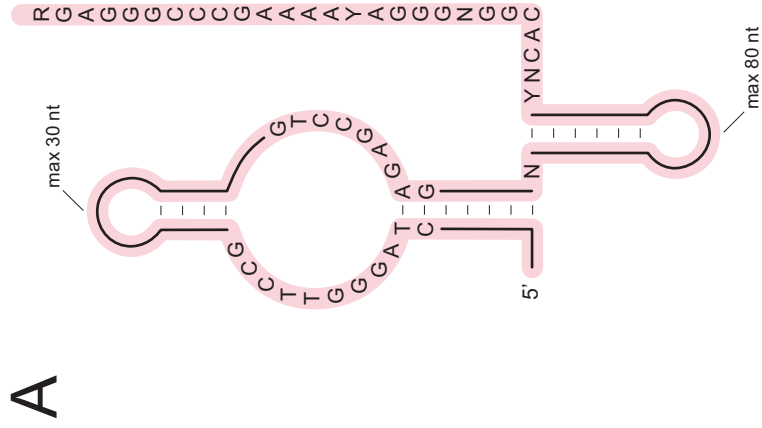

**B**

| Accession    | Metagenome | Start position | End position | Regulated function (COG) |
|--------------|------------|----------------|--------------|--------------------------|
| AAFX01006062 | Soil       | 501            | 390          | COG0531                  |
| AAFY01000234 | Whale1     | 1646           | 1540         | COG0715                  |
| AAFY01010653 | Whale1     | 806            | 697          | COG0600                  |
| AAFY01015288 | Whale1     | 311            | 420          | COG0715                  |
| AAFY01021029 | Whale1     | 845            | 729          | COG0715                  |

**C**

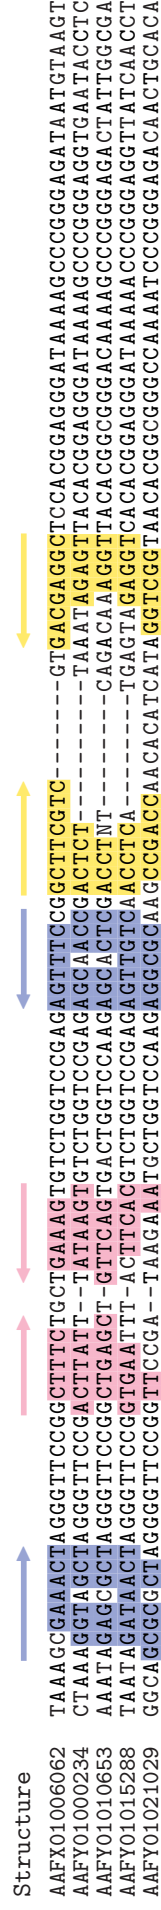

Additional file 14: (A) YKKC/YXKD riboswitch pattern. (B) List of identified YKKC/YXKD riboswitches. (C) Alignment of YKKC/YXKD riboswitch sequences.
