# Supplementary material for: Abundance and functional diversity of riboswitches in microbial communities
Source: PubMed Central journal article supplement (PMC2211319; doi:10.1186/1471-2164-8-347), 2007-10-01
Supplement: 1471-2164-8-347-S19.pdf [file 1471-2164-8-347-S19.pdf]

| Accession   | Metagenome | Start position | End position | Regulated function (COG) |
|-------------|------------|----------------|--------------|--------------------------|
| AAF01011285 | Soil       | 692            | 519          | COG2239                  |

**B**

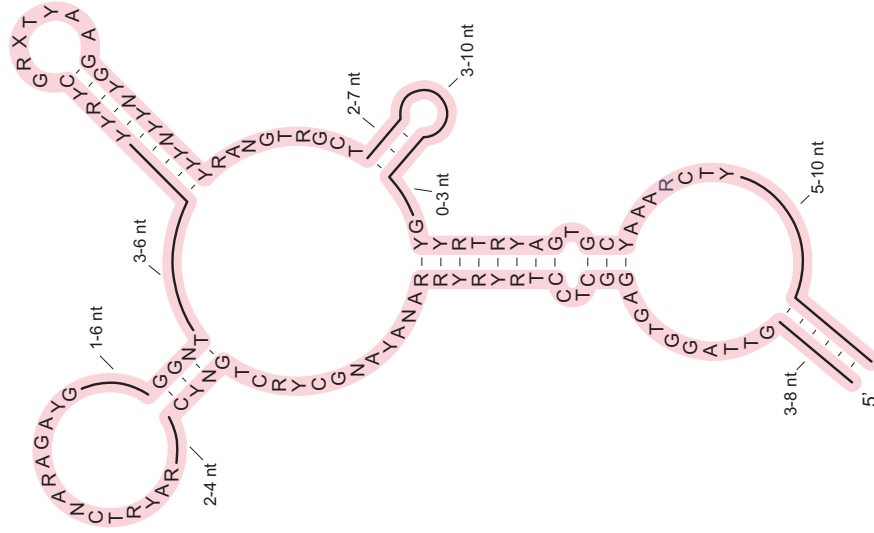

**C**

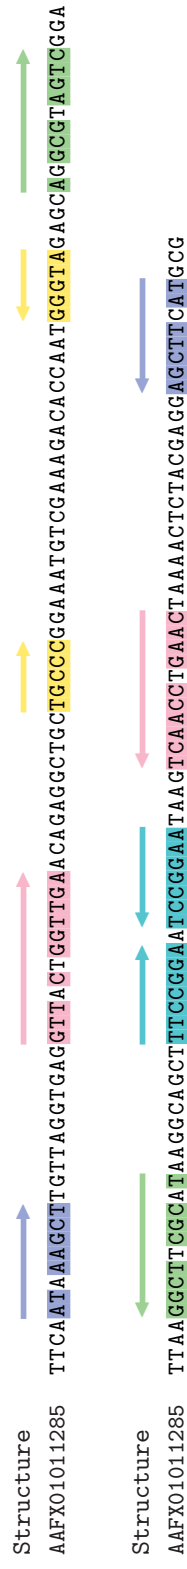

Additional file 19: (A) YKOK riboswitch pattern. (B) List of identified YKOK riboswitches. (C) Alignment of YKOK riboswitch sequences.
