# Supplementary material for: Abundance and functional diversity of riboswitches in microbial communities
Source: BMC Genomics. 2007 Oct 1;8:347. doi: 10.1186/1471-2164-8-347 (PMC2211319; doi:10.1186/1471-2164-8-347)

| Accession    | Metagenome | Start position | End position | Regulated function (COG) |
|--------------|------------|----------------|--------------|--------------------------|
| CH025042     | Sargasso   | 236            | 349          | COG1971                  |
| CH027617     | Sargasso   | 2221           | 2108         | COG1971                  |
| AAFX01006168 | Soil       | 410            | 534          | COG0861                  |
| AAFX01013281 | Soil       | 659            | 513          | COG0861                  |
| AAFX01019015 | Soil       | 466            | 328          | COG2119                  |
| AAFX01069316 | Soil       | 219            | 336          | COG0861                  |
| AAFX01111584 | Soil       | 309            | 172          | No ORF                   |
| AAFX01128094 | Soil       | 605            | 483          | COG0861                  |
| AAFY01005645 | Whale1     | 334            | 216          | COG2119                  |
| AAFY01017336 | Whale1     | 236            | 105          | No ORF                   |
| AAFY01027355 | Whale1     | 461            | 596          | No ORF                   |

Additional file 15: (A) YYBP/YKOY riboswitch pattern. (B) List of identified YYBP/YKOY riboswitches. (C) Alignment of YYBP/YKOY riboswitch sequences.

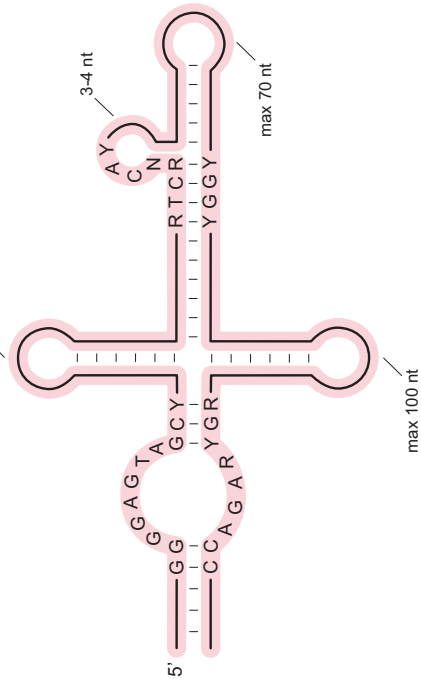

Structure

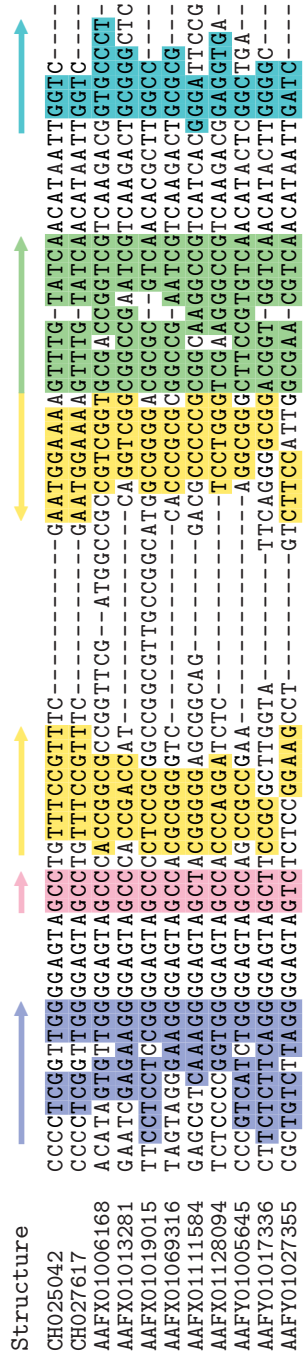

Structure

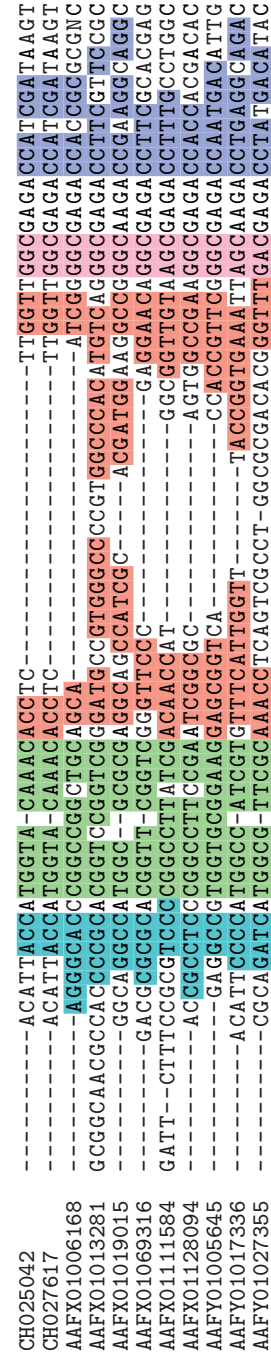

Supplement: Additional file 15 — Search pattern and sequence alignment of YYBP/YKOY riboswitches. [file 1471-2164-8-347-S15.pdf]
