# Supplementary material for: Abundance and functional diversity of riboswitches in microbial communities
Source: BMC Genomics. 2007 Oct 1;8:347. doi: 10.1186/1471-2164-8-347 (PMC2211319; doi:10.1186/1471-2164-8-347)
Supplement: Additional file 16 — Search pattern and sequence alignment of lysine riboswitches. [file 1471-2164-8-347-S16.pdf]

A

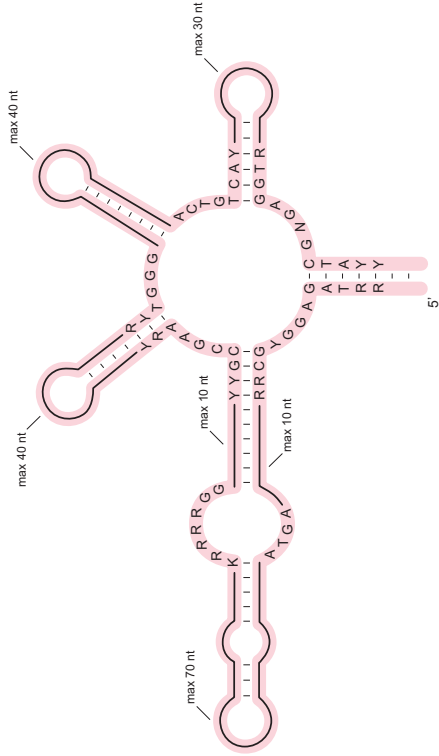

B

| Accession | Metagenome | Start position | End position | Regulated function (COG) |
|-----------|------------|----------------|--------------|--------------------------|
| CH194310  | Sargasso   | 449            | 637          | COG0527                  |

C

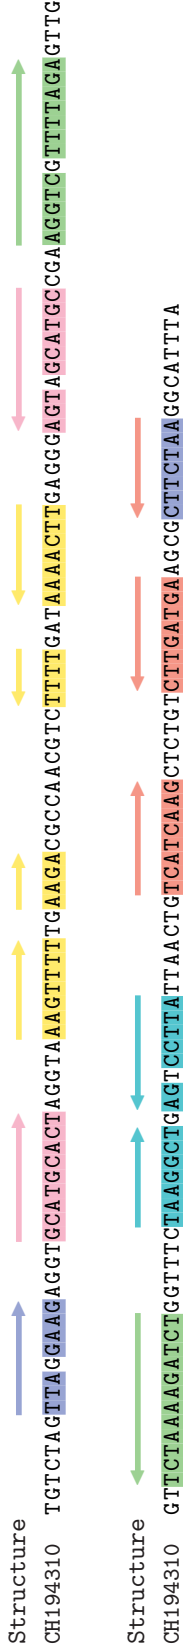

Additional file 16: (A) Lysine riboswitch (L-box) pattern. (B) List of identified lysine riboswitches. (C) Alignment of lysine riboswitch sequences.
